# Supplementary material for: Accuracy of Interictal and Ictal Electric and Magnetic Source Imaging: A Systematic Review and Meta-Analysis
Source: Front Neurol. 2019 Dec 3;10:1250. doi: 10.3389/fneur.2019.01250 (PMC6901665; doi:10.3389/fneur.2019.01250)
Supplement: Supplementary Material 1 — Results of the literature search. [file Table_1.XLSX]

## Sheet: ESI
	Electric source imaging (ESI) Studies			ESI included (for review)			Interictal ESI			Interictal ESI (Final for analysis)			Ictal ESI			Ictal ESI (Final for analysis)
Sno	Author	year	Journal	Sno	Author	year	Sno.	Author	Year	Sno.	Author	Year	Sno.	Author	Year	Sno.	Author	Year
1	Sperdin et al	2018	eLife	1	Koren et al	2018	1	Abreu et al	2018	1	Brodbeck et al	2011	1	Assaf et al	1999	1	Assaf et al	1999
2	Hosseini et al	2018	Clinical neurophysiology:IFCN	2	Feng et al	2018	2	Abdallah et al	2017	2	Brodbeck et al	2010	2	Assaf et al	1997	2	Benizcky et al(1)	2013
3	Koren et al	2018	Clinical neurophysiology:IFCN	3	Abreu et al	2018	3	Brodbeck et al	2011	3	Brodbeck et al	2009	3	Benizcky	2013	3	Benizcky et al( 2)	2016
4	Olindo et al	2018	Journal of stroke and cerebrovascular disease	4	SharmaP et al	2018	4	Brodbeck et al	2010	4	Cenetno et al	2017	4	Boon	2002	4	Li Chunsheng	2016
5	Wang et al	2018	Computerized medical imaging and graphics	5	Staljanssens et al	2017	5	Brodbeck et al	2009	5	Elshof et al	2012	5	Benizcky	2016	5	koren et al	2018
6	Proverbio et al	2018	Brain research	6	Staljanssens et al	2017	6	Birot et al	2014	6	Feng et al	2018	6	Chunsheng	2016	6	Nemtsas	2017
7	Stefan et al	2018	Epilepsy research	7	Nemtsas et al	2017	7	Cenetno et al	2017	7	Feng et al	2016	7	Lie Ding	2007
8	Batch Justeen et al	2018	Clinical Neurophysiology	8	Abdallah et al	2017	8	coito et al	2015	8	Heers et al	2014	8	habib et al	2015
9	Samiee et al	2018	Neurobiology of disease	9	van Mierlo et al	2017	9	Ding et al	2006	9	Kargiotis et al	2014	9	H hallez	2009
10	Cossu et al	2018	Epilepsy research	10	Feng et al	2017	10	Ding et al	2007	10	Lantz et al	2003	10	Kossler	2010
11	Witkowska-Wrobel et al	2018	NeuroImage	11	Centeno et al	2017	11	Elshof et al	2012	11	Lascano et al	2016	11	koren et al	2018
12	Feng et al	2018	Seizure	12	Lascano et al	2016	12	Feng et al	2018	12	Leitzen et al	2003	12	Kovac	2014
13	Zubler et al	2018	Clinical Neurophysiology	13	Paadelis et al	2016	13	Feng et al	2016	13	Mazerio et al	2015	13	Lantz	2001
14	Adebimpe	2018	Neuroimage: Clinical	14	Sorabpour et al	2016	14	Feng et al	2017	14	Megevand	2014	14	Lee	2009
15	Mohamed et al	2018	Epilespy and behaviour	15	Habib et al	2016	15	Gavaret et al	2008	15	Michel	2004	15	Lu Y	2012
16	Kasper et al	2018	Neuroimage: Clinical	16	Heers et al	2016	16	Gavaret et al	2004	16	Park et al	2015	16	Miller	2007
17	Verhoeven et al	2018	Neuroimage: Clinical	17	Pellegrino et al	2016	17	Groening et al	2009	17	Rikir et al	2014	17	Nemtsas	2017
18	Abreu et al	2018	Clinical neurophysiology:IFCN	18	Li et al	2016	18	Heers et al	2014	18	Sperli et al	2006	18	Pellgrino	2016
19	SharmaP et al	2018	European journal of Neurology	19	Sohrabpour et al	2016	19	Heers et al	2015	19	van Milero et al	2017	19	Staljanssens	2016
20	Ma et al	2018	Operative neurosurgery	20	Mallia et al	2016	20	Itabashi et al	2014				20	Staljanssens	2017
21	Pellegrino et al	2018	Human brain mapping	21	Strobbe et al	2016	21	Kargiotis et al	2014				21	Stern	2009
22	Alving et al	2017	Seizure	22	Monte-Restrepo et al	2016	22	Lai et al	2011				22	Vulliemoz	2010
23	Staljanssens et al	2017	Brain toppgraphy	23	Russo-Angelo et al	2016	23	Lnatz	1997				23	Vulliemoz	2010
24	Staljanssens et al	2017	Neuroimage: Clinical	24	Beniczky et al	2016	24	Lantz et al	2003				24	Yang	2010
25	Wostyn et al	2017	International journal of neural system	25	Feng et al	2016	25	Lascano et al	2016				25	Yang	2010
26	Cam et al	2017	Neuroimage	26	Coito et al	2015	26	Leitzen et al	2003
27	Seeck etal	2017	Clinical neurophysiology:IFCN	27	Sohrabpour et al	2015	27	Liu et al	2016
28	Wennberg et al	2017	Epilepsia open	28	Park et al	2015	28	Liu et al	2014
29	Steriade et al	2017	Epileosia open	29	Mazerio et al	2015	29	Maillard et al	2009
30	Nemtsas et al	2017	Epilepsia	30	Wennberg et al	2014	30	Mallia et al	2016
31	Abdallah et al	2017	Neuroimage: Clinical	31	Birot et al	2014	31	Mazerio et al	2015
32	Weiss Lucas et al	2017	Neuroimage: Clinical	32	Megevend et al	2014	32	Megevand	2014
33	Huberfeld et al	2017	Neurochurgie	33	Kovac et al	2014	33	Michel	2004
34	Reyns et al	2017	Neurochurgie	34	Heers et al	2014	34	Monte- Respreto	2015
35	Bansal et al	2017	Pediatric Neurology	35	Itabashi et al	2014	35	Papadlis et al	2016
36	Rossi Sebastiano et al	2017	Clinical Neurophysiology	36	Storti et al	2014	36	Park et al	2015
37	Shibata et al	2017	Clinical Neurophysiology	37	Kargiotis et al	2014	37	Persan et al	2010
38	Wu et al	2017	Neuroscience	38	Rikir et al	2014	38	plummer et al	2007
39	Raghavan et al	2017	Epilepsy & Behavior	39	Lu et al	2012	39	Rikir et al	2014
40	Kitwitee et al	2017	World Neurosurgery	40	Lu et al	2012	40	Russo et al	2016
41	De tiege et al	2017	Seizure	41	Elshoff et al	2012	41	Sohrabpour et al2015	2015
42	Tsolaki et al	2017	Neurobiology of Aging	42	Lai et al	2011	42	Sohrabpour et al2015	2016
43	Ramanujam et al	2017	Seizure	43	Wang et al	2011	43	Sperli et al	2006
44	Becker et al	2017	NeuroImage	44	Yang et al	2011	44	Storti et al	2013
45	Hur et al	2017	Seizure	45	Brodbeck et al	2011	45	Strobbe et al	2016
46	Watanabe et al	2017	Clinical Neurophysiology	46	Koessler et al	2010	46	van Milero et al	2017
47	Hedrich et al	2017	NeuroImage	47	Vulliemoz et al	2010	47	Vuliemoz et al	2009
48	Hussain et al	2017	Epilepsy Research	48	Brodbeck et al	2010	48	Wang et al	2011
49	Bouet et al	2017	Neuroimage: Clinical	49	Vulliemoz et al	2010	49	Wennberg et al	2014
50	Kane et al	2017	Clinical Neurophysiology Practice	50	Person et al	2010	50	Zhang et al	2003
51	Ochoa et al	2017	Epilepsy and behaviour	51	Groening et al	2009
52	Kasinadhuni et al	2017	Brain stimulation	52	Hallez et al	2009
53	Erem et al	2017	IEEE transactions on medical imaging	53	Maillard et al	2009
54	Boerwinkle et al	2017	Brain connectivity	54	Brodbeck et al	2009
55	van Mierlo et al	2017	Epilepsia open	55	Vulliemoz et al	2009
56	Feng et al	2017	Journal of clinical neuroscience :NSSA	56	Ding et al	2007
57	Stamoulis et al	2017	Epilepsy research	57	Miller et al	2007
58	Centeno et al	2017	Annals of Neurology	58	Plummer et al	2007
59	Nazem -Zadeh et al	2016	Brain toppgraphy	59	Sperli et al	2006
60	Lascano et al	2016	Clinical neurophysiology:IFCN	60	Gavaret et al	2006
61	Paadelis et al	2016	Journal of visualized Experiments:JoVE	61	Michel et al	2004
62	Mouthaan et al	2016	Epilepsia	62	Gavaret et al	2004
63	Sorabpour et al	2016	Confernce procedings:IEEG engineering	63	Lantz et al	2003
64	Badier et al	2016	Brain topography	64	Zhang et al	2003
65	Duncan et al	2016	The Lnacet Neurology	65	Leijten et al	2003
66	Coito et al	2016	Epilepsia	66	Lantz et al	1997
67	He et al	2016	Clinical neurophysiology:IFCN	67	Assaf et al	1997
68	von Ellenrieder et al	2016	Brain topography	68	Assaf et al	1999
69	Kim et al	2016	Epilepsy Research	69	Lantz et al	2001
70	Habib et al	2016	World Neurosurgery	70	Lee et al	2009
71	Wasade et al	2016	Epilepsy and behaviour case reports	71	Stern et al	2009
72	Heers et al	2016	Brain topography	72	Yang et al	2011
73	Pellegrino et al	2016	Frontiers in neuroscience	73	Beniczky et al	2013
74	Chowdhry et al	2016	NeuroImage	74	Boon et al	2002
75	Pellegrino et al	2016	Human brain mapping	75	Gaveret et al	2009
76	Grova et al	2016	Human brain mapping
77	Li et al	2016	IEEE transactions on biomedical engineering
78	Englot et al	2016	Epilepsy research
79	Xiang et al	2016	Journal of Pain
80	Urbain et al	2016	NeuroImage
81	Phillips et al	2016	Cortex
82	Estrada et al	2016	Nuclear medicine and biology
83	Kuhlmann et al	2016	NeuroImage
84	Lithari et al	2016	Brain research
85	Verhoef et al	2016	Cortex
86	Wilson et al	2016	Clinical Radiology
87	Huang et al	2016	Psychoneuroendocrnology
88	Daugherty et al	2016	Journal of business research
89	Gabriel et al	2016	Neurobiology of learning and memory
90	Jeong et al	2016	Clinical Neurophysiology
91	Hur et al	2016	Clinical Neurophysiology
92	Tang et al	2016	Clinical Neurophysiology
93	Pascarella et al	2016	Journal of neuroscience methods
94	Liu et al	2016	NeuroImage
95	Januszko et al	2016	Clinical Neurophysiology
96	Tripathi et al	2016	International journal of surgery
97	Huang et al	2016	Clinical Neurophysiology
98	Kim et al	2016	Brain and development
99	Sohrabpour et al	2016	NeuroImage
100	Atyabi et al	2016	Expert Systems with applications
101	Sunwoo et al	2016	Epilespy research
102	Mallia et al	2016	Clinical Neurophysiology
103	Linane et al	2016	Epilepsy and behaviour
104	Akalin et al	2016	NeuroImage
105	Koulouri et al	2016	Applied Numerical Mathematics
106	Wang et al	2016	Seziure
107	Becker et al	2016	IRBM
108	Mallia et al	2016	Clinical Neurophysiology
109	Strobbe et al	2016	NeuroImage.Clinical
110	Monte-Restrepo et al	2016	Brain topography
111	Russo-Angelo et al	2016	Epilepsia
112	Xinag et al	2016	Brain and development
113	Beniczky et al	2016	Seizure
114	Feng et al	2016	Clinical Neurophysiology
113	Sohrabpour et al	2016	IEEE transactions in biomedical engineering
116	Patel et al	2016	Journal of Neurology
117	Coito et al	2016	IEEE transactions in biomedical engineering
118	Russo-Angelo et al	2016	Epilepsia
119	Bae et al	2015	Journal of visulaized experiments
120	Rathor et al	2015	Epileptic disorders
121	Xiang et al	2015	Brain Topography
122	Habboush et al	2015	Conference proceedings :
123	Grouiller et al	2015	European journal of nuclear medicine and molecular imaging
124	Gavaret et al	2015	Neurophysiology clinique: Clinical neurophysiology
125	Del Felice et al	2015	Clinical neurophysiology:IFCN
126	Del Felice et al	2015	Brain stimulation
127	Choudhry et al	2015	Brain toppgraphy
128	Boscolo et al	2015	Plos one
129	Coito et al	2015	Epilepsia
130	Kulkarni et al	2015	Journal of neuroscience methods
131	Englot et al	2015	Epilepsia
132	Chan et al	2015	Neuroimage
133	Bagattini et al	2015	Neuropsychologia
134	Liu et al	2015	Neuroscience
135	Tsolaki et al	2015	Brain research
136	Jeppesen et al	2015	Seizure
137	Zhang et al	2015	Neuroimage: Clinical
138	Kammermeire et al	2015	Clinical neurophysiology
139	Hur et al	2015	Seziure
140	Zhang et al	2015	Clinical Neurophysiology
141	Sohrabpour et al	2015	Clinical Neurophysiology
142	Chu et al	2015	NeuroImage
143	Park et al	2015	Journal of clinical neurology ( Seoul)
144	Yogi et al	2015	Neurology
145	Mazerio et al	2015	Brain topography
146	Xiang et al	2015	Journal of neuroscience methods
147	Wennberg et al	2014	Clinical Neurophysiology: IFCN
148	da Silva et al	2014	Epilepsy research
149	Le cam et al	2014	Conference proceedings : IEEE
150	Del Felice et al	2014	Epileptic disorders: International epilepsy J with video tape
151	Caune et al	2014	NeuroImage
152	Birot et al	2014	NeuroImgae:Clinical
153	Wennberg et al	2014	Clinical Neurophysiology :IFCN
154	Megevend et al	2014	JNNP
155	Lu et al	2014	IEEE transactions on biomedical methods
156	Kovac et al	2014	Journal of clinical neurophysiology:AEES
157	Heers et al	2014	Human brain mapping
158	Zhu et al	2014	NeuroImage
159	Khan et al	2014	Fronteirs in human neuroscience
160	Avanzini et al	2014	Clinical Neurophysiology: IFCN
161	Hamaneh et al	2014	Journal of clinical neurophysiology:AEES
162	Miao et al	2014	Epilepsy research
163	Singh et al	2014	Annals of IAN
164	Haneef et al	2014	Annals of IAN
165	Florin et al	2014	NeuroImage
166	Jahodava eta l	2014	European journal of radiology
167	Huang et al	2014	Neuroimage: Clinical
168	Mohring et al	2014	Inetrnational journal of psychophysiology
169	Swindlehurest et al	2014	Academic press library in Signal processing Vol 3
170	Wang et al	2014	Journal of affective disorders
171	Huang et al	2014	Neuroimage: Clinical
172	Itabashi et al	2014	Clinical neurophysiology
173	Jacobs et al	2014	NeuroImage
174	Inoue et al	2014	Brain and development
175	Del Felice et al	2014	Epilepsy & Behavior
176	Hartmann et al	2014	Neurophysiology clinique: Clinical neurophysiology
177	Pedreira et al	2014	NeuroImage
178	Rathore et al	2014	Epielpsy research
179	Storti et al	2014	NeuroImage
180	Kargiotis et al	2014	Epielpsy research
181	Wang et al	2014	Annals of neurology
182	Mu et al	2014	Seizure
183	Pittau et al	2014	Frontiers in neurology
184	Piros et al	2014	Seizure
185	Rikir et al	2014	Epilepsia
186	Lascano et al	2014	Neurosurgery
187	Custo et al	2014	NeuroImage
188	Vaudano et al	2013	Frontiers in neurology
189	Zhu et al	2013	Journal of clinical neurophysiology:AEES
190	Koptelova et al	2013	Zhurnal vaprosy neirokhirugii( Russian)
191	Xiang et al	2013	The journal of pain
192	Noguchi et al	2013	European journal of radiology
193	Perry et al	2013	NeuroImage
194	Chen et al	2013	Neuroimage: Clinical
195	Yao et al	2013	Brain and development
196	Jeong et al	2013	Neuroimage: Clinical
197	Jin et al	2013	Clinical neurophysiology
198	Rodionov et al	2013	Epilepsy research
199	De tiege et al	2013	Epilepsy research
200	Abdullah et al	2013	Procedia - social and behavioral science
201	Irmia et al	2013	Clinical neurophysiology
202	Lee et al	2013	NeuroImage
203	Beragliere et al	2013	Seizure
204	Mohmed et al	2013	Clinical Neurophysiology
205	de Goojer et al	2013	Human brain mapping
206	Lascano et al	2013	Epilepsy research
207	Yamazaki	2013	Frontiers in neurology
208	Mirandola et al	2013	Epilepsy and behaviour case reports
209	Schneider et al	2013	Epilepsia
210	Kim et al	2013	Epilepsy research
211	Moeller et al	2013	Human brain mapping
212	De tiege et al	2013	Epilepsy research
213	Liao et al	2013	Computer method and programs in biomedicine
214	Cho et al	2013	Physiological measurement
215	Wennberg et al	2013	Clinical Neurophysiology: IFCN
216	Datta et al	2013	Epilepsy & Behavior
217	Del Felice et al	2013	Clinical Neurophysiology: IFCN
218	Kim et al	2013	Korean journal of Paediatrics
219	Uda et al	2012	Clinical Neurophysiology
220	Mehrabian et al	2012	Medical Image analysis
221	Heinrichs-Graham et al	2012	Biologicla psychology
222	Guo et al	2012	Brain and development
223	Mori et al	2012	Brain and development
224	Huang et al	2012	NeuroImage
225	Bouet et al	2012	NeuroImage
226	Riney et al	2012	European journal of radiology
227	Wu et al	2012	Seizure
228	Bosch-Bayerd et al	2012	NeuroImage
229	Liang et al	2012	Neurobiology of disease
230	Fujiwara et al	2012	Epilespy research
231	Yang et al	2012	Brain: a Journal of Neurology
232	Kreigel et al	2012	Journal of clinical neurophysiology:AEES
233	Kaiboriboon et al	2012	Nature reviews: Neurology
234	Schneider et al	2012	Epilespy & behaviour: E&B
235	Kim et al	2012	Journal of Korean medical science
236	Kennedy et al	2012	Journal of clinical neurophysiology:AEES
237	Salanova et al	2012	Journal of clinical neurophysiology:AEES
238	Lu et al	2012	Clinical Neurophysiology: IFCN
239	Lu et al	2012	Conference proceedings : IFCN
240	Zhu et al	2012	Conference proceedings:IEEE
241	Unwongse et al	2012	Journal of clinical neurophysiology:AEES
242	Lu et al	2012	Clinical Neurophysiology: IFCN
243	Elshoff et al	2012	Epilepsia
244	Pillai et al	2011	NeuroImage
245	Wang et al	2011	Clinical Neurophysiology
246	Khursheed et al	2011	NeuroImage
247	Lai et al	2011	NeuroImage
248	Kakisaka et al	2011	Clinical Neurophysiology
249	Haufe et al	2011	NeuroImage
250	Stern et al	2011	Clnical Neurophysiology
251	Aboian et al	2011	Pediatric neurology
252	Arceniegas et al	2011	Intenational journal of psychophysiology
253	Sakkalis et al	2011	Computers in biology and medicine
254	He et al	2011	Journal of neuroscience methods
255	Hur et al	2011	Brain and development
256	Wang et al	2011	Clinical Neurophysiology
257	Yang et al	2011	NeuroImage
258	Malpas et al	2011	Natures reveiws. Neurology
259	Cho et al	2011	Brain topography
260	Acar et al	2011	Conference proceedings :IEEE
261	Shiraishi et al	2011	Brain & development
262	Brodbeck et al	2011	Brain: a Journal of Neurology
263	Zhu et al	2011	Conferec eproceddings :IEEE
264	Widjaja et al	2010	Epilepsy research
265	Wilson et al	2010	Brain and cognition
266	Gaetz et al	2010	NeuroImage
267	Chen et al	2010	Clinical neurophysiology
268	Heydrich et al	2010	Consciousness and cognition
269	Diener et al	2010	NeuroImage
270	Muthukumarswami et al	2010	NeuroImage
271	Canuet et al	2010	Epilepsy & behaviour
272	Kim et al	2010	NeuroImage
273	Rodionov et al	2010	NeuroImage
274	Lascano et al	2010	Neuroscience
275	Koessler et al	2010	NeuroImage
276	Heers et al	2010	Epilepsy research
277	Herfurth et al	2010	Epilepsy & behaviour
278	Homes et al	2010	NeuroImage
279	Wu et al	2010	Neurology
280	Larson et al	2010	Brain topography
281	Kailboriboon et al	2010	Clinical Neurophysiology: IFCN
282	Rosenkranz et al	2010	Magma ( New York)
283	Vulliemoz et al	2010	Epilepsia
284	Brodbeck et al	2010	Epilepsia
285	Koessler et al	2010	Conference proceedings : IEEE
286	Vulliemoz et al	2010	NeuroImage
287	Person et al	2010	Conference Poceedings: IEEE
288	Chen et al	2009	NeuroImage
289	Neema et al	2009	NeurImage
290	Amor et al	2009	NeuroImage
291	Prakash et al	2009	NeuroImage
292	Xiang et al	2009	Brain research
293	Koessler et al	2009	NeuroImage
294	valdes-Hernandez et al	2009	Journal of neuroscience methods
295	Liu et al	2009	NeuroImage
296	Groening et al	2009	NeuroImage
297	Hallez et al	2009	Clinical Neurophysiology
298	Acar et al	2009	conference proceedings:..
299	Stefan et al	2009	Revue neurologique
300	Knowlton et al	2009	annals of neurology
301	Chang et al	2009	Journal of neurosurgery
302	Maillard et al	2009	Clinical neurophysiology : off..
303	Colon et al	2009	Journal of Clinical neurophysiology : off..
304	Wang et al	2009	Conference proceedings : .. Ann…
305	Brodbeck et al	2009	Clinical neurophysiology : off..
306	Funke et al	2009	Clinical EEG and neuroscience
307	Vulliemoz et al	2009	NeuroImage
308	Mohamed et al	2008	International Journal of Psychophysiology
309	Saito et al	2008	Pediatric neurology
310	Dalal et al	2008	NeuroImage
311	Zhang et al	2008	NeuroImage
312	Kim et al	2008	Computers in biology and medicine
313	Weiland et al	2008	NeuroImage
314	Cheyne et al	2008	NeuroImage
315	Munoz-Yunta et al	2008	Clinical Neurophysiology
316	Kim et al	2008	NeuroImage
317	Wichert-Ana et al	2008	Epilepsy Research
318	Jann et al	2008	NeuroImage
319	Koessler et al	2008	NeuroImage
320	Chen et al	2008	NeuroImage
321	Tan et al	2008	Epilepsy research
322	Bercovici et al	2008	Clinical Neurophysiology
323	Guggisberg et al	2008	NeuroImage
324	Wu et al	2008	Epilepsy Research
325	Alper et al	2008	neuroImage
326	Sutherling et al	2008	Neurology
327	Perkins et al	2008	Journal of child neorology
328	Lau et al	2008	Epilepsy research
329	Knowlton et al	2008	annals of neurology
330	De Tiege et al	2008	JBR-BTR : organe de la Societe royale belg
331	Munoz-Yunta et al	2008	Clinical neurophysiology
332	Leijten et al	2008	Current opinion in neurology
333	Gavaret et al	2008	Neuro-Chirurgie
334	Knowlton et al	2008	annals of neurology
335	Richmond et al	2007	Developmental Review
336	Volpe et al	2007	Brain research bulletin
337	Bowyer et al	2007	International congress series
338	Mikuni et al	2007	NeuroImage
339	Ding et al	2007	NeuroImage
340	Xiang et al	2007	International congress series
341	Merrifield et al	2007	Epilepsy and Behaviour
342	Miller et al	2007	NeuroImage
343	Tucker et al	2007	epilepsy and behaviour
344	Plummer et al	2007	Clinical neurophysiology
345	Cao et al	2007	International congress series
346	stefan et al	2007	Der Nervenarzt
347	Madhavan et al	2007	Current opinion in neurology
348	Ding et al	2007	Journal of clinical neurophysiology
349	Utter et al	2006	Journal of the american college of
350	Lin et al	2006	Seminars in Pediatric neurology
351	Paul et al	2006	NeuroImage
352	Kirsch et al	2006	Clinical Neurophysiology
353	Lee et al	2006	Schizophrenia research
354	McDonald et al	2006	Epilepsy and Behaviour
355	Lee et al	2006	epilepsy and behaviour
356	Ding et al	2006	physics in Medicine and biology
357	Wu et al	2006	Neurology
358	Sperli et al	2006	Epilepsia
359	Chuang et al	2006	neuroimaging clinics of North America
360	Gavaret et al	2006	Journal of clinical Neurophysiology
361	Wennberg et al	2006	annals of neurology
362	Knowlton et al	2006	annals of neurology
363	Lee et al	2005	NeuroRX
364	kettenmann et al	2005	Clinical Neurophysiology
365	Guyotat et al	2005	Neurochirurgie
366	Mucci et al	2005	Psychatry research: Neuroimaging
367	Tobimatsu et al	2005	Handbook of clinical Neurophisiology
368	Bowyer et al	2005	Epilepsy & Behaviour
369	Trebuchon-Da et al	2005	Neuroimage
370	Kubota et al	2005	Seizure
371	Kuzniecky et al	2005	NeuroRX
372	Adjouadi et al	2005	Journal of clinical neurphysiology : off..
373	Chiron et al	2004	Revue neurologique
374	Ossadtchi et al	2004	Clinical Neurophysiology
375	Nishikata et al	2004	Archieves of Gerontology
376	Castillo et al	2004	Neuroimage
377	Michel et al	2004	Advances in clinical neurophysiology
378	Maestu et al	2004	Brain and Langauage
379	Mcmillan et al	2004	Neuroimage
380	Gavaret et al	2004	Advances in clinical neurophysiology
381	Parra et al	2004	Epilepsy and behaviour
382	Ganslandt et al	2004	Clinical neurology and neurosurgery
383	Burneo et al	2004	Epilepsy research
384	Bartolomei et al	2004	Revue neurologique
385	Whelest et al	2004	Neurologist
386	Mihel et al	2004	Journal of Clinical neurophysiology
387	Kuzniecky et al	2004	Reviews in neurological diseases
388	Holowka et al	2004	Neurosurgery
389	Hall et al	2004	Headache
390	Knowlton et al	2004	Epilepsia
391	Genow et al	2004	Nueroimage
392	Gavaret et al	2004	Journal of Clinical neurophysiology
393	Brell et al	2003	Neurocirgia
394	Musse et al	2003	Pattern recognition
395	Silva -Pereyra et al	2003	Clinical Neurophysiology
396	Duffner et al	2003	Surgical Neurology
397	Vant't ENT et al	2003	Clinical neurophysiology
398	Lantz et al	2003	Clinical neurophysiology
399	Zhang et al	2003	Clinical neurophysiology
400	Verrotti et al	2003	Neurophysiology clinique: Clinical neurophysiology
401	Ossenblok et al	2003	Clincial Neurophysiology: IFCN
402	Leijten et al	2003	Journal of clinical neurophysiology:AEES
403	stefan et al	2003	Brain: a Journal of Neurology
404	Verotti et al	2003	Pediatric neurology
405	Fernandez et al	2002	Biological Psychiatry
406	Wheless et al	2002	International congress series
407	Wheless et al	2002	Seminars in Pediatric neurology
408	Kato et al	2002	International congress series
409	Sarkari et al	2002	Seminars in Pediatric neurology
410	Eliashiv et al	2002	Neurology
411	Kuzniecky et al	2002	Seminars in neurology
412	Ishibashi et al	2002	Neurological research
413	Savic et al	2001	Brain research bulletin
414	de Jongh et al	2001	Clincial Neurophysiology
415	Hattori et al	2001	Brain and development
416	Daniels et al	2001	Clincial Neurophysiology
417	Snead et al	2001	Brain and development
418	Castillo et al	2001	Neurocase
419	Otsubo et al	2001	Journal of child neorology
420	Halboni et al	2000	Clinical Neurophysiology
421	Forss et al	2000	Clinical Neurophysiology at the beginning of the 21st century
422	Sheth et at	2000	Seminars in Pediatric neurology
423	Kobayashi et al	2000	Clinical Neurophysiology
424	Parra et al	2000	Journal of clinical neurophysiology: AEEE
425	Morioka et al	2000	Neurosurgical review
426	Parra et al	2000	Revista de neurlogia
427	Nowak et al	2000	Nuerologia I Neurochirurgia polska
428	Simos et al	2000	Neuroreport
429	Bernstein et al	1999	Neuroscience
430	Nass et al	1999	Pediatric neurology
431	Logan et al	1999	Seminars in Pediatric neurology
432	Morioka et al	1999	Epilepsy research
433	Binnie et al	1999	Clinical neurophysiology
434	Otsubo et al	1999	Epilepsia
435	Simos et al	1999	Journal of Neurosurgery
436	Gross et al	1999	Stereotactic and functional neurosurgery
437	Takanashi et al	1998	European journal of pediatric neurology
438	Koles et al	1998	EEG and Clinical neurophysiology
439	Koles et al	1998	EEG and Clinical neurophysiology
440	Engel J et al	1998	Epilepsy research
441	Ishibashi et al	1998	Surgical Neurology
442	Peresson et al	1998	Brain and development
443	Kalviainen et al	1997	Epilepsy research
444	Basar et al	1997	International Journal of Psychophysiology
445	Otsubo et al	1997	Pediatric neurology
446	Gondo et al	1997	Journal of Epilepsy
447	Lantz et al	1997	Electroencephalography and clinical neurophysiology
448	Gallen et al	1997	Epilepsia
449	Brockhaus et al	1997	Electroencephalography and clinical neurophysiology
450	Ebersole et al	1997	Epilepsia
451	Assaf et al	1997	Epilepsia
452	Baumgartner	1997	Pediatric neurosurgery
453	Bouazza- Marouf et al	1996	Mechatronics
454	Laakso et al	1996	Neurobiology of aging
455	Wong et al	1996	Computerized medical imaging and graphics
456	Tesche et al	1996	Cognitive brain research
457	Kucharczyk et al	1996	Academic radiology
458	Morioka et al	1996	Surgical Neurology
459	Gondo et al	1996	Journal of Epilepsy
460	Koszer et al	1996	Electroencephalography and clinical neurophysiology
461	Smith et al	1995	Journal of Epilepsy
462	Acahrya et al	1995	Computerized medical imaging and graphics
463	Tesche et al	1995	Cognitive brain research
464	Fried et al	1995	MRI
465	Koles et al	1995	Electroencephalography and clinical neurophysiology
466	Tilg et al	1995	International journal of biomedical computing
467	Ebersole et al	1995	neuroimaging clinics of North America
468	Lewine et al	1995	neuroimaging clinics of North America
469	Aung et al	1995	Neurosurgery
470	Gallen et al	1994	Electroencephalography and clinical neurophysiology
471	Torro et al	1994	Electroencephalography and clinical neurophysiology/Evoked potentials section
472	Reihl et al	1994	Physica B : Condensed matter
473	Smith et al	1994	Stereotactic and functional neurosurgery
474	Schreg M et al	1994	Acta neurologica scandinavica. Supplement
475	Smith JR et al	1994	Stereotactic and functional neurosurgery
476	Schreg M et al	1994	Neurophysiology clinique: Clinical neurophysiology
477	Schneider et al	1993	Applied superconductivity
478	Swerdloff et al	1993	Electroencephalography and clinical neurophysiology
A1	Assaf et al	1999	Epilepsia
A2	Lantz et al	2001	Clinical Neurophysiology
A3	Lee et al	2009	Clinical Neurophysiology
A4	Stern et al	2009	Journal of Clinical Neurophysiology
A5	Yang et al	2011	IEEE
A6	Beniczky et al	2013	Epilepsia
A7	Boon et al	2002	Journal of Clinical Neurophysiology
A8	Gaveret et al	2009	Epilepsia
* Marked with red colour at end are after additional searches

## Sheet: MSI
	All studies (311)				Studies (after removing duplicates)			Interictal MSI (full text review)			Interictal MSI (Final for analysis)			Ictal MSI (full text reveiw)			Ictal MSI (Final for analysis)
Sno	Author	Year	Journal	Sno.	Author	year	Journal	Sno.	Author	Year	Sno.	Author	Year	Sno	Author	Year	Sno.	Author	Year
1	Sorrentino P	2018	Neuroimage Clin.	1	Sorrentino P	2018	Neuroimage Clin.	1	Almubarak et al	2014	1	Almubarak et al	2014	1	Assaf et al	2003	1	Assaf et al	2003
2	Kasper BS	2018	Neuroimage Clin	2	Kasper BS	2018	Neuroimage Clin	2	Agirre- Arrizubieta et al	2009	2	Assaf et al	2004	2	Badier et al	2015	2	Badier et al(d SI)	2015
3	Xu J	2018	Hum Brain Mapp	3	Xu J	2018	Hum Brain Mapp	3	Assaf et al	2004	3	Chang et al	2009			2015	3	Badier et al(ECD)	2015
4	Hosseini SAH	2018	Clin Neurophysiol	4	Hosseini SAH	2018	Clin Neurophysiol	4	Bouet et al	2012	4	Englot et al	2015	3	Eliashiv et al	2002	4	Eliashiv et al	2002
5	Boerwinkle VL	2017	Brain Connect	5	Boerwinkle VL	2017	Brain Connect	5	Brockhaus et al	1997	5	Kim H(1) et al	2012	4	Medvedovsky et al	2012	5	Medvedovsky et al	2012
6	Centeno M	2017	Ann Neurol	6	Centeno M	2017	Ann Neurol	6	Chang et al	2009	6	Jeong et al	2012	5	Pellegrino et al	2016
7	Raghavan M	2017	Epilepsy Behav	7	Raghavan M	2017	Epilepsy Behav	7	de Gooijer-vandenGroep et al	2012	7	Kaibariboon et al	2010	6	Ramanujam et al	2016
8	Hedrich T	2017	neuroimage	8	Hedrich T	2017	neuroimage	8	De Tiege et al	2015	8	Kasper et al	2018	7	Schneider et al	2013
9	Sohrabpour A	2016	Conf Proc IEEE Eng Med Biol Soc	9	Sohrabpour A	2016	Conf Proc IEEE Eng Med Biol Soc	9	Englot et al	2015	9	Kim H(2) et al	2013	8	Shiraishi et al	2011
10	Kim D	2016	Epilepsy Res	10	Kim D	2016	Epilepsy Res	10	Fisher et al	2005	10	Knowlton et al	1997	9	Tanaka	2009
11	Sohrabpour A	2016	IEEE Trans Biomed Eng	11	Sohrabpour A	2016	IEEE Trans Biomed Eng	11	Gallen et al	1997	11	Mamelak et al	2012	10	Tilz et al	2002
12	Chowdhury RA	2016	Neuroimage	12	Chowdhury RA	2016	Neuroimage	12	Grova et al	2016	12	Schneider et al	2012
13	Liu K	2016	Neuroimage	13	Liu K	2016	Neuroimage	13	Hedrich et al	2017	13	Smith et al	2003	* Badier et al ; Single study but 2 methods of source imaging)
14	Sohrabpour A	2016	Neuroimage	14	Sohrabpour A	2016	Neuroimage	14	Heers et al	2014	14	Sutherling et al	2008
15	Zerouali Y	2016	Hum Brain Mapp	15	Zerouali Y	2016	Hum Brain Mapp	15	Holowka et al	2004	15	Kaptelova et al	2013
16	Strohmeier D	2016	IEEE Trans Med Imaging	16	Strohmeier D	2016	IEEE Trans Med Imaging	16	Kim(1) et al	2012	16	Wang et al (1)	2014
17	Huang CW	2016	Clin Neurophysiol	17	Huang CW	2016	Clin Neurophysiol	17	Jeong et al	2012	17	Wang et al (2)	2015
18	Nazem-Zadeh MR	2016	Brain Topogr	18	Nazem-Zadeh MR	2016	Brain Topogr	18	Kaibariboon et al	2010	18	Wu XT et al (1)	2012
19	Pellegrino G	2016	Hum Brain Mapp	19	Pellegrino G	2016	Hum Brain Mapp	19	Kamimura et al	2006	19	Wu XT et al (2)	2012
20	Mouthaan BE	2016	Epilepsia	20	Mouthaan BE	2016	Epilepsia	20	Kasper et al	2018
21	Stevens T	2016	J Neurosci Methods	21	Stevens T	2016	J Neurosci Methods	21	Kim(2) et al	2013
22	Grova C	2016	Hum Brain Mapp	22	Grova C	2016	Hum Brain Mapp	22	Kim (2) et al	2016
23	von Ellenrieder N	2016	Brain Topogr	23	von Ellenrieder N	2016	Brain Topogr	23	Knowlton et al	1997
24	Nazem-Zadeh MR	2016	Conf Proc IEEE Eng Med Biol Soc	24	Nazem-Zadeh MR	2016	Conf Proc IEEE Eng Med Biol Soc	24	Knowlton et al	2006
25	Jonmohamadi Y	2016	J Neural Eng	25	Jonmohamadi Y	2016	J Neural Eng	25	Knowlton et al	2009
26	Bagić A	2015	Clin Neurophysiol	26	Bagić A	2015	Clin Neurophysiol	26	Mamelak et al	2012
27	Chowdhury RA	2015	Brain Topogr	27	Chowdhury RA	2015	Brain Topogr	27	Mohmed et al	2013
28	Gavaret M	2015	Neurophysiol Clin	28	Gavaret M	2015	Neurophysiol Clin	28	Ochi et al	2007
29	Heers M	2016	Brain Topogr	29	Heers M	2016	Brain Topogr	29	Ossenblok et al	2007
30	Klamer S	2015	Brain Topogr	30	Klamer S	2015	Brain Topogr	30	Pataraia et al	2004
31	Huang MX	2014	Neuroimage	31	Huang MX	2014	Neuroimage	31	Pellegrino et al	2017
32	Almubarak et al	2014		32	Cottereau BR	2015	J Neurosci Methods	32	Schneider et al	2012
33	Cottereau BR	2015	J Neurosci Methods	33	Huang MX	2014	Neuroimage Clin	33	Smith et al	2003
34	Huang MX	2014	Neuroimage Clin	34	Almubarak et al	2014		34	Sutherling et al	2008
35	Wang ZI	2014	Ann Neurol	35	Wang ZI	2014	Ann Neurol	35	Kaptelova et al	2013
36	Miao A	2014	Neurosci Lett	36	Miao A	2014	Neurosci Lett	36	Wang et al	2014
37	Wennberg R	2014	Clin Neurophysiol	37	Wennberg R	2014	Clin Neurophysiol	37	Wang et al	2015
38	Huang MX	2014	Neuroimage	38	Huang MX	2014	Neuroimage	38	Wennberg et al	2014
39	Dumas T	2013	PLoS One	39	Dumas T	2013	PLoS One	39	Wheless et al	1999
40	Zhu M	2013	J Clin Neurophysiol	40	Zhu M	2013	J Clin Neurophysiol	40	Wu Xin-Tong et al	2017
41	Liao K	2013	Comput Methods Programs Biomed	41	Liao K	2013	Comput Methods Programs Biomed	41	Wu Xin-Tong et al	2012
42	Kim H	2013	Epilepsy Res	42	Kim H	2013	Epilepsy Res	42	Wu JY et al	2006
43	Zhu M	2012	Conf Proc IEEE Eng Med Biol Soc	43	Zhu M	2012	Conf Proc IEEE Eng Med Biol Soc	43	Zerouali et al	2016
44	Ding L	2012	Conf Proc IEEE Eng Med Biol Soc	44	Ding L	2012	Conf Proc IEEE Eng Med Biol Soc
45	Gummadavelli A	2013	Brain Res	45	Gummadavelli A	2013	Brain Res
46	Schneider F	2012	Epilepsy Behav	46	Schneider F	2012	Epilepsy Behav
47	Huang MX	2012	Neuroimage	47	Huang MX	2012	Neuroimage
48	De Tiège X	2012	J Neurol Neurosurg Psychiatry	48	De Tiège X	2012	J Neurol Neurosurg Psychiatry
49	Ding L	2011	Conf Proc IEEE Eng Med Biol Soc	49	Ding L	2011	Conf Proc IEEE Eng Med Biol Soc
50	Zhu M	2011	Conf Proc IEEE Eng Med Biol Soc	50	Zhu M	2011	Conf Proc IEEE Eng Med Biol Soc
51	Ding L	2011	Hum Brain Mapp	51	Ding L	2011	Hum Brain Mapp
52	Op de beeck M	2011	Epilepsia	52	Op de beeck M	2011	Epilepsia
53	Ross B	2011	J Clin Neurophysiol	53	Ross B	2011	J Clin Neurophysiol
54	Ramírez RR	2011	Neuroimage	54	Ramírez RR	2011	Neuroimage
55	von Ellenrieder N	2010	Conf Proc IEEE Eng Med Biol Soc	55	von Ellenrieder N	2010	Conf Proc IEEE Eng Med Biol Soc
56	Honaga E	2010	Neurosci Lett	56	Honaga E	2010	Neurosci Lett
57	Engels L	2010	Neurophysiol Clin	57	Engels L	2010	Neurophysiol Clin
58	Kaiboriboon K	2010	Clin Neurophysiol	58	Kaiboriboon K	2010	Clin Neurophysiol
59	Huang MX	2010	Brain Topogr	59	Huang MX	2010	Brain Topogr
60	Funke M	2009	Clin EEG Neurosci	60	Funke M	2009	Clin EEG Neurosci
61	Lee PS	2010	J Affect Disord.	61	Lee PS	2010	J Affect Disord.
62	Colon AJ	2009	J Clin Neurophysiol	62	Colon AJ	2009	J Clin Neurophysiol
63	Bagic A	2009	J Clin Neurophysiol	63	Bagic A	2009	J Clin Neurophysiol
64	Chang EF	2009	J Neurosurg	64	Chang EF	2009	J Neurosurg
65	Knowlton RC	2009	Ann Neurol	65	Knowlton RC	2009	Ann Neurol
66	De Tiège X	2008	JBR-BTR	66	De Tiège X	2008	JBR-BTR
67	Sutherling WW	2008	Neurology	67	Sutherling WW	2008	Neurology
68	Leijten FS	2008	Curr Opin Neurol	68	Leijten FS	2008	Curr Opin Neurol
69	Gavaret M	2008	Neurochirurgie	69	Gavaret M	2008	Neurochirurgie
70	Perkins FF	2008	J Child Neurol	70	Perkins FF	2008	J Child Neurol
71	Lau M	2008	Epilepsy Res	71	Lau M	2008	Epilepsy Res
72	Jun SC	2008	Neuroimage	72	Jun SC	2008	Neuroimage
73	Muñoz-Yunta JA	2008	Clin Neurophysiol	73	Muñoz-Yunta JA	2008	Clin Neurophysiol
74	Gramfort A	2007	Conf Proc IEEE Eng Med Biol Soc	74	Gramfort A	2007	Conf Proc IEEE Eng Med Biol Soc
75	Attal Y	2007	Conf Proc IEEE Eng Med Biol Soc	75	Attal Y	2007	Conf Proc IEEE Eng Med Biol Soc
76	Kiebel SJ	2008	Neuroimage	76	Kiebel SJ	2008	Neuroimage
77	Wan X	2008	Neuroimage	77	Wan X	2008	Neuroimage
78	Jerbi K	2007	Proc Natl Acad Sci U S A	78	Jerbi K	2007	Proc Natl Acad Sci U S A
79	Im CH	2006	Phys Med Biol	79	Im CH	2006	Phys Med Biol
80	Wennberg R	2006	Ann Neurol	80	Wennberg R	2006	Ann Neurol
81	Knowlton RC	2006	Ann Neurol	81	Knowlton RC	2006	Ann Neurol
82	Lee D	2006	Epilepsy behav	82	Lee D	2006	Epilepsy behav
83	Lee SH	2006	Schizophr Res	83	Lee SH	2006	Schizophr Res
84	Moran JE	2005	Brain Topogr	84	Moran JE	2005	Brain Topogr
85	Schimpf PH	2005	IEEE Trans Biomed Eng	85	Schimpf PH	2005	IEEE Trans Biomed Eng
86	Im CH	2005	Hum Brain Mapp	86	Im CH	2005	Hum Brain Mapp
87	Holowka SA	2004	Neurosurgery	87	Holowka SA	2004	Neurosurgery
88	Akalin-Acar Z	2004	Phys Med Biol	88	Akalin-Acar Z	2004	Phys Med Biol
89	Huang MX	2004	Brain Topogr	89	Huang MX	2004	Brain Topogr
90	Wheless JW	2004	Neurologist.	90	Wheless JW	2004	Neurologist.
91	Gençer NG	2004	Phys Med Biol	91	Gençer NG	2004	Phys Med Biol
92	Flor-Henry P	2004	Psychiatry Res	92	Flor-Henry P	2004	Psychiatry Res
93	Koles ZJ	2004	Psychiatry Res	93	Koles ZJ	2004	Psychiatry Res
94	Smith JR	2003	Stereotact Funct Neurosurg	94	Smith JR	2003	Stereotact Funct Neurosurg
95	Holliday IE	2003	Hum Brain Mapp	95	Holliday IE	2003	Hum Brain Mapp
96	Leijten FS	2003	J Clin Neurophysiol	96	Leijten FS	2003	J Clin Neurophysiol
97	Duffner F	2003	Surg Neurol	97	Duffner F	2003	Surg Neurol
98	Ossenblok P	2003	Clin Neurophysiol.	98	Ossenblok P	2003	Clin Neurophysiol.
99	Maihöfner C	2002	Pain	99	Maihöfner C	2002	Pain
100	Eliashiv DS	2002	Neurology	100	Eliashiv DS	2002	Neurology
101	Gavit L	2001	IEEE Trans Biomed Eng	101	Gavit L	2001	IEEE Trans Biomed Eng
102	Smith JR	2000	Neurosurg	102	Smith JR	2000	Neurosurg
103	Gençer NG	1999	Phys Med Biol	103	Gençer NG	1999	Phys Med Biol
104	Otsubo H	1999	Epilepsia	104	Otsubo H	1999	Epilepsia
105	Baillet S	1999	IEEE Trans Biomed Eng	105	Baillet S	1999	IEEE Trans Biomed Eng
106	Brockhaus A	1997	Electroencephalogr Clin Neurophysiol	106	Brockhaus A	1997	Electroencephalogr Clin Neurophysiol
107	Gallen CC	1997	Epilepsia.	107	Gallen CC	1997	Epilepsia.
108	Ebersole JS	1997	Epilepsia.	108	Ebersole JS	1997	Epilepsia.
109	Aung M	1995	Neurosurgery	109	Aung M	1995	Neurosurgery
110	Ebersole JS	1995	Neuroimaging Clin N Am	110	Ebersole JS	1995	Neuroimaging Clin N Am
111	Smith JR,	1994	Stereotact Funct Neurosurg	111	Smith JR,	1994	Stereotact Funct Neurosurg
112	Wieringa HJ	1993	Med Biol Eng Comput	112	Wieringa HJ	1993	Med Biol Eng Comput
113	Scherg M	1992	Brain Topogr	113	Scherg M	1992	Brain Topogr
114	Bagić AI	2017	J Clin Neurophysiol	114	Bagić AI	2017	J Clin Neurophysiol
115	Velmurugan	2016	Neurol Sci.	115	Velmurugan	2016	Neurol Sci.
116	Abreu R	2018	Clin Neurophysiol	116	Abreu R	2018	Clin Neurophysiol
117	Velmurugan J	2018	Epilepsia	117	Velmurugan J	2018	Epilepsia
118	Hyde DE	2018	Conf Proc IEEE Eng Med Biol Soc	118	Hyde DE	2018	Conf Proc IEEE Eng Med Biol Soc
119	Shukla G	2017	J Child Neurol.	119	Shukla G	2017	J Child Neurol.
120	Wu C	2017	Neuroscience	120	Wu C	2017	Neuroscience
121	Nemtsas P	2017	Epilepsia	121	Nemtsas P	2017	Epilepsia
122	Wu C	2017	Brain Topogr	122	Wu C	2017	Brain Topogr
123	Feyissa AM	2017	Epilepsy Res	123	Feyissa AM	2017	Epilepsy Res
124	Stamoulis C	2017	Epilepsy Res	124	Stamoulis C	2017	Epilepsy Res
125	Ramanujam B	2017	Seizure	125	Ramanujam B	2017	Seizure
126	Gavaret M	2016	Epilepsy Res	126	Gavaret M	2016	Epilepsy Res
127	Beniczky S	2016	Seizure	127	Beniczky S	2016	Seizure
128	Kim D	2016	Epilepsy Res	128	Kim D	2016	Epilepsy Res
129	Russo A	2016	Epilepsia	129	Russo A	2016	Epilepsia
130	Pellegrino G	2016	Hum Brain Mapp	130	Habib MA	2016	World Neurosurg
131	Russo A	2016	Epilepsia	131	Badier JM	2016	Brain Topogr
132	Habib MA	2016	World Neurosurg	132	Khan SA	2014	Epilepsy Res
133	Badier JM	2016	Brain Topogr	133	Tenney JR	2014	Ann neurol
134	Khan SA	2014	Epilepsy Res	134	DiLorenzo DJ	2014	J Neurosurg
135	Tenney JR	2014	Ann neurol	135	Miao A	2014	Epilepsy Res
136	DiLorenzo DJ	2014	J Neurosurg	136	Xiang J	2013	PLoS One
137	Miao A	2014	Neurosci Lett.	137	Storti SF	2014	Neuroimage
138	Miao A	2014	Epilepsy Res	138	Schneider F	2013	Epilepsia
139	Xiang J	2013	PLoS One	139	Salanova V	2012	J Clin Neurophysiol
140	Storti SF	2014	Neuroimage	140	Kriegel MF	2012	J Clin Neurophysiol
141	Schneider F	2013	Epilepsia	141	Unnwongse K	2012	J Clin Neurophysiol
142	Salanova V	2012	J Clin Neurophysiol	142	Kennedy JD	2012	J Clin Neurophysiol
143	Kriegel MF	2012	J Clin Neurophysiol	143	Wasade VS	2013	Br J Neurosurg
144	Unnwongse K	2012	J Clin Neurophysiol	144	Hill NJ	2012	J Vis Exp.
145	Kennedy JD	2012	J Clin Neurophysiol	145	Shih JJ	2012	Clin EEG Neurosci
146	Wasade VS	2013	Br J Neurosurg	146	Aarabi A	2012	Neurophysiol Clin
147	Hill NJ	2012	J Vis Exp.	147	Despotovic I	2013	Hum Brain Mapp
148	Shih JJ	2012	Clin EEG Neurosci	148	Lu Y,	2012	Clin Neurophysiol
149	Aarabi A	2012	Neurophysiol Clin	149	Brodbeck V	2011	Brain
150	Despotovic I	2013	Hum Brain Mapp	150	Vaudano AE	2012	Seizure
151	Lu Y,	2012	Clin Neurophysiol	151	Koessler L	2010	Conf Proc IEEE Eng Med Biol Soc
152	Brodbeck V	2011	Brain	152	Shiraishi H	2011	Brain Dev
153	Vaudano AE	2012	Seizure	153	Shirozu H	2010	Epilepsy Res
154	Koessler L	2010	Conf Proc IEEE Eng Med Biol Soc	154	Koessler L	2010	Neuroimage
155	Shiraishi H	2011	Brain Dev	155	Brodbeck V	2010	Epilepsia
156	Shirozu H	2010	Epilepsy Res	156	Holmes MD	2010	Neurosurgery
157	Koessler L	2010	Neuroimage	157	Xiang J	2010	J Neurosurg Pediatr
158	Brodbeck V	2010	Epilepsia	158	Stefan H	2009	J Neurol
159	Holmes MD	2010	Neurosurgery	159	García-Morales I	2009	Epilepsy Behav
160	Kaiboriboon K	2010	Clin Neurophysiol	160	Gavaret M	2010	J Neurol Neurosurg Psychiatry
161	Xiang J	2010	J Neurosurg Pediatr	161	Daunizeau J	2010	Neuroimage
162	Stefan H	2009	J Neurol	162	Hallez H	2009	Clin Neurophysiol
163	García-Morales I	2009	Epilepsy Behav	163	Tanaka N	2009	Epilepsy Res
164	Gavaret M	2010	J Neurol Neurosurg Psychiatry	164	Stern Y	2009	J Clin Neurophysiol
165	Daunizeau J	2010	Neuroimage	165	Groening K	2009	Neuroimage
166	Hallez H	2009	Clin Neurophysiol	166	Rullmann M	2008	Neuroimage
167	Tanaka N	2009	Epilepsy Res	167	Knowlton RC	2008	Ann Neurol
168	Stern Y	2009	J Clin Neurophysiol	168	Knowlton RC	2008	Ann Neurol
169	Groening K	2009	Neuroimage	169	Leal AJ	2008	Clin Neurophysiol
170	Rullmann M	2008	Neuroimage	170	Lopes da Silva	2008	IEEE Rev Biomed Eng
171	Sutherling WW	2008	Neurology	171	Shahar E	2008	J Child Neurol
172	Knowlton RC	2008	Ann Neurol	172	Shibasaki H	2007	Clin Neurophysiol
173	Gavaret M	2008	Neurochirurgie	173	Leal AJ	2007	Clin Neurophysiol
174	Knowlton RC	2008	Ann Neurol	174	Vergult A	2007	Epilepsia
175	Leal AJ	2008	Clin Neurophysiol	175	Madhavan D	2007	Curr Opin Neurol
176	Lopes da Silva	2008	IEEE Rev Biomed Eng	176	Ding L	2007	Neuroimage
177	Shahar E	2008	J Child Neurol	177	Pastor J	2006	Clin Neurophysiol
178	Shibasaki H	2007	Clin Neurophysiol	178	Leal A	2006	Epilepsia
179	Leal AJ	2007	Clin Neurophysiol	179	Mäkelä JP	2006	Neurosurgery
180	Vergult A	2007	Epilepsia	180	Oishi M	2006	J Neurosurg
181	Madhavan D	2007	Curr Opin Neurol	181	Sperli F	2006	Epilepsia
182	Ding L	2007	Neuroimage	182	Widdess-Walsh P	2006	J Neuroimaging
183	Pastor J	2006	Clin Neurophysiol	183	Leal AJ	2006	Clin Neurophysiol
184	Leal A	2006	Epilepsia	184	Wu JY	2006	Neurology
185	Mäkelä JP	2006	Neurosurgery	185	Zumsteg D	2005	Neurology
186	Oishi M	2006	J Neurosurg	186	Holowka SA	2004	Neurosurgery
187	Sperli F	2006	Epilepsia	187	Knowlton RC	2004	Epilepsia
188	Widdess-Walsh P	2006	J Neuroimaging	188	Karataş A	2004	J Clin Neurosci
189	Leal AJ	2006	Clin Neurophysiol	189	Lantz G	2003	J Clin Neurophysiol
190	Wu JY	2006	Neurology	190	Assaf BA	2003	Epilepsia
191	Knowlton RC	2006	Ann neurol	191	Tang L	2003	J Neurosurg
192	Zumsteg D	2005	Neurology	192	Boon P	2002	J Clin Neurophysiol
193	Holowka SA	2004	Neurosurgery	193	Ishibashi H	2002	Neurol Res
194	Knowlton RC	2004	Epilepsia	194	Rafael H	2001	J Neurosurg
195	Karataş A	2004	J Clin Neurosci	195	Rosenow F	2001	Brain
196	Lantz G	2003	J Clin Neurophysiol	196	Hoshida T	2001	No To Hattatsu
197	Assaf BA	2003	Epilepsia	197	Mittal S	2001	J Neurosurg
198	Tang L	2003	J Neurosurg	198	Merlet I	2001	Clin Neurophysiol
199	Boon P	2002	J Clin Neurophysiol	199	Sipilä O	2000	Eur J Nucl Med
200	Eliashiv DS	2002	Neurology	200	Waberski TD	2000	Epilepsia
201	Ishibashi H	2002	Neurol Res	201	Gross RE	1999	Stereotact Funct Neurosurg
202	Rafael H	2001	J Neurosurg	202	Blanke O	2000	Clin Neurophysiol
203	Rosenow F	2001	Brain	203	Ahnlide JA	2000	Lakartidningen
204	Hoshida T	2001	No To Hattatsu	204	Boon P	1999	Rev Neurol
205	Mittal S	2001	J Neurosurg	205	Michel CM	1999	J Clin Neurophysiol
206	Merlet I	2001	Clin Neurophysiol	206	Gevin A	1999	J Clin Neurophysiol
207	Sipilä O	2000	Eur J Nucl Med	207	Assaf BA	1999	Epilepsia
208	Waberski TD	2000	Epilepsia	208	Nagai H	1998	No To Hattatsu
209	Gross RE	1999	Stereotact Funct Neurosurg	209	Assaf BA	1997	Epilepsia
210	Blanke O	2000	Clin Neurophysiol	210	Shindo K	1997	Epilepsia
211	Ahnlide JA	2000	Lakartidningen	211	d'Asseler YM	1997	Acta Neurol Belg
212	Boon P	1999	Rev Neurol	212	Elger CE	1994	Acta Neurol Scand Suppl
213	Michel CM	1999	J Clin Neurophysiol	213	Smith JR	1994	Stereotact Funct Neurosurg
214	Gevin A	1999	J Clin Neurophysiol	214	Mégevand P	2018	Curr Opin Neurol
215	Otsubo H	1999	Epilepsia	215	Pellegrino G	2018	Hum Brain Mapp
216	Assaf BA	1999	Epilepsia	216	Shibata S	2017	Clin Neurophysiol
217	Nagai H	1998	No To Hattatsu	217	Papadelis C	2016	J Vis Exp
218	Assaf BA	1997	Epilepsia	218	Falco-Walter J	2017	Neurotherapeutics
219	Shindo K	1997	Epilepsia	219	Stefan H	2017	Seizure
220	d'Asseler YM	1997	Acta Neurol Belg	220	Jmail N	2016	Brain Topogr
221	Gallen CC	1997	Epilepsia	221	Englot DJ	2016	Epilepsy Res.
222	Elger CE	1994	Acta Neurol Scand Suppl	222	Zhu H	2015	Seizure
223	Smith JR	1994	Stereotact Funct Neurosurg	223	Wang Y	2015	J Neurol Sci
224	Mégevand P	2018	Curr Opin Neurol	224	Englot DJ	2015	Epilepsia
225	Pellegrino G	2018	Hum Brain Mapp	225	Bennett-Back O	2014	J Neurosurg
226	Shibata S	2017	Clin Neurophysiol	226	Heers M	2014	Hum Brain Mapp
227	Papadelis C	2016	J Vis Exp	227	Koptelova AM	2013	h Vopr Neirokhir Im N N Burdenko
228	Falco-Walter J	2017	Neurotherapeutics	228	Mohamed IS	2013	Epilepsia
229	Stefan H	2017	Seizure	229	Malinowska U	2014	Hum Brain Mapp
230	Jmail N	2016	Brain Topogr	230	Paetau R	2013	Handb Clin Neurol
231	Englot DJ	2016	Epilepsy Res.	231	Hanaya R	2013	Epilepsy Res.
232	Zhu H	2015	Seizure	232	Jeong W	2012	J Korean Med Sci.
233	Wang Y	2015	J Neurol Sci	233	Wu XT	2013	Acta Neurol Scand.
234	Englot DJ	2015	Epilepsia	234	Medvedovsky M,	2012	Epilepsia
235	Gavaret M	2015	Neurophysiol Clin	235	Kim H	2012	J Korean Med Sci.
236	Heers M	2016	Brain Topogr	236	Wu XT	2012	Seizure
237	Bennett-Back O	2014	J Neurosurg	237	de Gooijer-van de Groep KL	2013	Hum Brain Mapp.
238	Heers M	2014	Hum Brain Mapp	238	Bouet R	2012	Neuroimage
239	Koptelova AM	2013	h Vopr Neirokhir Im N N Burdenko	239	Shiraishi H	2011	J Clin Neurophysiol
240	Mohamed IS	2013	Epilepsia	240	Carrette E	2011	Epilepsy Res.
241	Malinowska U	2014	Hum Brain Mapp	241	Yagyu K,	2010	Epilepsy Res.
242	Paetau R	2013	Handb Clin Neurol	242	Canuet L	2010	Epilepsy Behav.
243	Hanaya R	2013	Epilepsy Res.	243	Stefan H.	2009	Rev Neurol (Paris)
244	Jeong W	2012	J Korean Med Sci.	244	Agirre-Arrizubieta Z	2009	Brain
245	Wu XT	2013	Acta Neurol Scand.	245	Santiuste M	2008	J Clin Neurophysiol
246	Medvedovsky M,	2012	Epilepsia	246	Fujimoto A	2009	Brain Dev.
247	Kim H	2012	J Korean Med Sci.	247	Tovar-Spinoza ZS	2008	Neurosurg Focus
248	Wu XT	2012	Seizure	248	Ishii R	2008	Epilepsy Res
249	de Gooijer-van de Groep KL	2013	Hum Brain Mapp.	249	Ochi A,	2008	Int J Psychophysiol.
250	De Tiège X	2012	JNNP	250	Pataraia E	2008	Clin Neurophysiol.
251	Bouet R	2012	Neuroimage	251	Mohamed IS	2007	Acta Neurol Scand Suppl
252	Shiraishi H	2011	J Clin Neurophysiol	252	Mohamed IS	2007	Epilepsia
253	Carrette E	2011	Epilepsy Res.	253	Ossenblok P	2007	Epilepsia
254	Shiraishi H	2011	Brain Dev	254	Kirsch HE	2007	J Clin Neurophysiol
255	Yagyu K,	2010	Epilepsy Res.	255	Balakrishnan G	2007	AnesthAnalg
256	Canuet L	2010	Epilepsy Behav.	256	Shibasaki H	2007	Clin Neurophysiol.
257	Funke M,	2009	Clin EEG Neurosci	257	Kamimura T	2006	Epilepsia
258	Stefan H.	2009	Rev Neurol (Paris)	258	Baumgartner C	2006	Curr Opin Neurol
259	Agirre-Arrizubieta Z	2009	Brain	259	Shiraishi H	2005	Epilepsia
260	De Tiège X	2008	JBR-BTR	260	Iwasaki M	2005	Epilepsia
261	Santiuste M	2008	J Clin Neurophysiol	261	Fischer MJ	2005	Brain
262	Fujimoto A	2009	Brain Dev.	262	Assaf BA	2004	Clin Neurophysiol
263	Tovar-Spinoza ZS	2008	Neurosurg Focus	263	Pataraia E	2004	Neurology
264	Ishii R	2008	Epilepsy Res	264	Ossadtchi A	2004	Clin Neurophysiol
265	Ochi A,	2008	Int J Psychophysiol.	265	Smith JR	2003	Stereotact Funct Neurosurg
266	Pataraia E	2008	Clin Neurophysiol.	266	Verrotti A	2003	Acta Paediatr
267	Mohamed IS	2007	Acta Neurol Scand Suppl	267	Knowlton RC	2003	curr Neurol Neurosci Rep
268	Mohamed IS	2007	Epilepsia	268	Mamelak AN	2002	J Neurosurg
269	Ossenblok P	2007	Epilepsia	269	Ishibashi H	2002	Neurol Res
270	Kirsch HE	2007	J Clin Neurophysiol	270	Tilz C	2002	Acta Neurol Scand
271	Balakrishnan G	2007	AnesthAnalg	271	Pataraia E	2002	Neurosurg Rev
272	Shibasaki H	2007	Clin Neurophysiol.	272	Oishi M	2002	J Neurosurg
273	Mohamed IS	2007	Acta Neurol Scand	273	Baumgartner C	2000	Epilepsia
274	Mäkelä JP	2006	Neurosurgery	274	Wheless JW	1999	Epilepsia
275	Oishi M	2006	J Neurosurg	275	Morioka T	1999	Epilepsy Res
276	Kamimura T	2006	Epilepsia	276	Ishibashi H	1998	Surg Neurol
277	Wu JY,	2006	Neurology	277	Kirchberger K	1998	Acta Neurol Scand
278	Baumgartner C	2006	Curr Opin Neurol	278	Ko DY	1998	Neurosurgery
279	Shiraishi H	2005	Epilepsia	279	Knowlton RC,	1997	Ann Neurol
280	Holowka SA	2004	Neurosurgery	280	Lewine JD	1995	Neuroimaging Clin N Am
281	Iwasaki M	2005	Epilepsia	281	Ioannides AA	1993	Physiol Meas
282	Fischer MJ	2005	Brain
283	Assaf BA	2004	Clin Neurophysiol
284	Knowlton RC	2004	Epilepsia
285	Pataraia E	2004	Neurology
286	Ossadtchi A	2004	Clin Neurophysiol
287	Smith JR	2003	Stereotact Funct Neurosurg
288	Verrotti A	2003	Acta Paediatr
289	Assaf BA	2003	Epilepsia
290	Knowlton RC	2003	curr Neurol Neurosci Rep
291	Tang L	2003	J Neurosurg.
292	Eliashiv DS	2002	Neurology
293	Mamelak AN	2002	J Neurosurg
294	Ishibashi H	2002	Neurol Res
295	Tilz C	2002	Acta Neurol Scand
296	Pataraia E	2002	Neurosurg Rev
297	Oishi M	2002	J Neurosurg
298	Ishibashi H	2002	J Neurosurg
299	Smith JR	2000	J Neurosurg
300	Baumgartner C	2000	Epilepsia
301	Wheless JW	1999	Epilepsia
302	Morioka T	1999	Epilepsy Res
303	Ishibashi H	1998	Surg Neurol
304	Kirchberger K	1998	Acta Neurol Scand
305	Ko DY	1998	Neurosurgery
306	Knowlton RC,	1997	Ann Neurol
307	Brockhaus A	1997	Electroencephalogr Clin Neurophysiol
308	Gallen CC	1997	Epilepsia
309	Aung M	1995	Neurosurgery
310	Lewine JD	1995	Neuroimaging Clin N Am
311	Ioannides AA	1993	Physiol Meas
